# Supplementary material for: Whole-Animal Chemical Screen Identifies Colistin as a New Immunomodulator That Targets Conserved Pathways
Source: PubMed Central journal article supplement — mBio. 2014 Aug 12;5(4):e01235-14. doi: 10.1128/mBio.01235-14 (PMC4145682; doi:10.1128/mbio.01235-14), 2014-08-12
Supplement: mbo004141937sf01.pdf [file mbo004141937sf01.pdf]

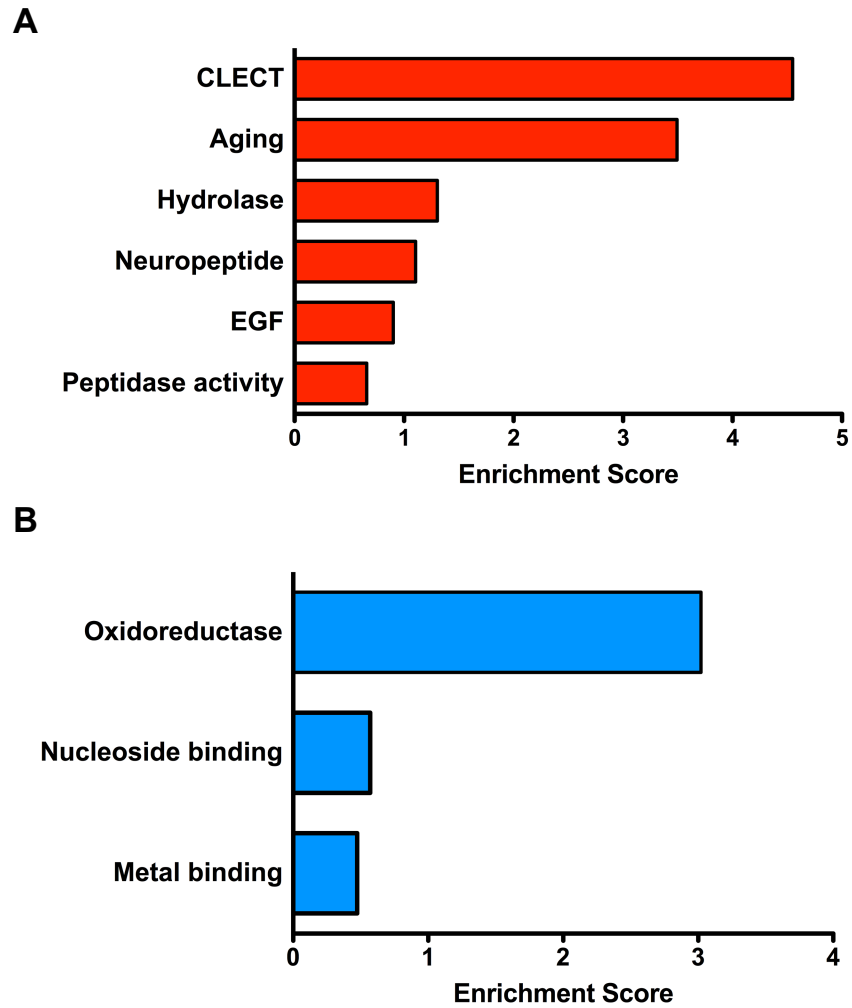

**Figure S1. DAVID functional annotation cluster analysis of up- and down-regulated genes by *Y. pestis* infection. (A) Top 6 clusters of genes up-regulated by *Y. pestis* infection. (B) Top 3 clusters of genes down-regulated by *Y. pestis* infection.**
