# Supplementary material for: Whole-Animal Chemical Screen Identifies Colistin as a New Immunomodulator That Targets Conserved Pathways
Source: PubMed Central journal article supplement — mBio. 2014 Aug 12;5(4):e01235-14. doi: 10.1128/mBio.01235-14 (PMC4145682; doi:10.1128/mbio.01235-14), 2014-08-12
Supplement: mbo004141937sf02.pdf [file mbo004141937sf02.pdf]

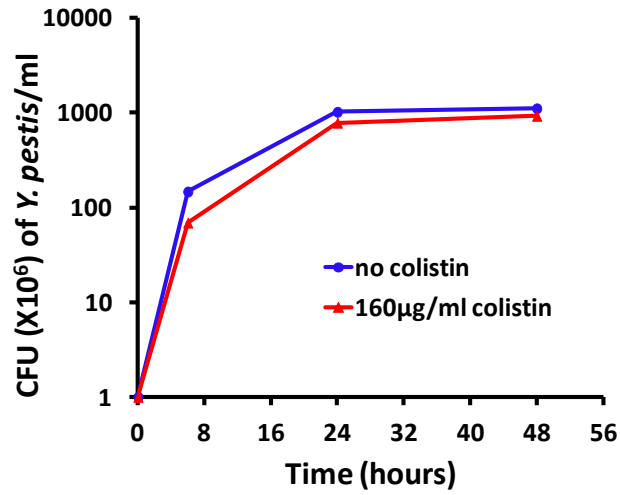

**Figure S2. Colistin does not affect the growth of *Y. pestis*.** *Y. pestis* KIM5 was cultured on modified NGM agar plates used for *C. elegans* killing assays supplemented with 160 µg/ml of colistin. At the indicated times, serial dilutions were prepared and plated to quantify colony forming units (CFU).
