# Supplementary material for: Whole-Animal Chemical Screen Identifies Colistin as a New Immunomodulator That Targets Conserved Pathways
Source: PubMed Central journal article supplement — mBio. 2014 Aug 12;5(4):e01235-14. doi: 10.1128/mBio.01235-14 (PMC4145682; doi:10.1128/mbio.01235-14), 2014-08-12
Supplement: mbo004141937sf04.pdf [file mbo004141937sf04.pdf]

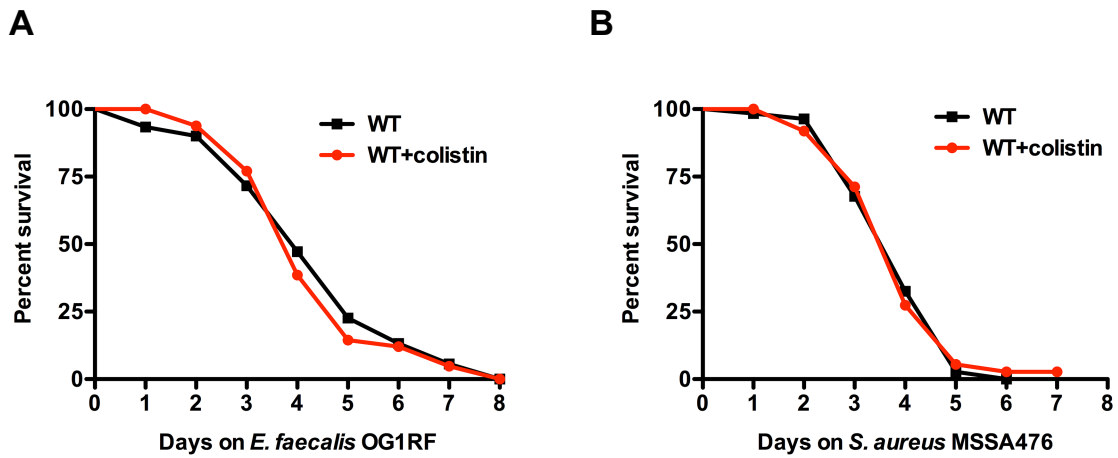

**Figure S4. Prophylactic treatment of colistin does not prolong life span on Gram-positive pathogen *E. faecalis* and *S. aureus*.** Wild-type N2 L4 animals treated with or without 20 $\mu$ g/ml colistin for 24 hours were transferred to modified NGM plates containing (A) *E. faecalis* or (B) *S. aureus* and scored for survival. Shown are representative assays of two independent experiments. N=60 animals per treatment.
