# Supplementary material for: Whole-Animal Chemical Screen Identifies Colistin as a New Immunomodulator That Targets Conserved Pathways
Source: PubMed Central journal article supplement — mBio. 2014 Aug 12;5(4):e01235-14. doi: 10.1128/mBio.01235-14 (PMC4145682; doi:10.1128/mbio.01235-14), 2014-08-12
Supplement: mbo004141937st1.pdf [file mbo004141937st1.pdf]

Table S1. List of 45 market drugs from the Prestwick library capable of inducing *pF35E12.5::gfp* expression.

*E. coli*

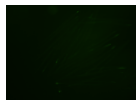

*Y. pestis*

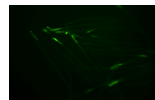

16 antimicrobial agents

| Prestw-number | Plate Nb/<br>Position Nb | Chemical name                | Structure | fmLa structure  | Mol weight<br>structure | Screen pics |
|---------------|--------------------------|------------------------------|-----------|-----------------|-------------------------|-------------|
| Prestw-67     | 01G08                    | Miconazole                   |           | C18H14Cl4N2O    | 416.13708               |             |
| Prestw-221    | 03G02                    | Norfloxacin                  |           | C16H18FN3O3     | 319.33856               |             |
| Prestw-237    | 03H08                    | Ofloxacin                    |           | C18H20FN3O4     | 361.3762                |             |
| Prestw-304    | 04G05                    | Econazole nitrate            |           | C18H16Cl3N3O4   | 444.70492               |             |
| Prestw-315    | 04H06                    | Minocycline hydrochloride    |           | C23H28ClN3O7    | 493.94851               |             |
| Prestw-353    | 05D04                    | Enoxacin                     |           | C15H17FN4O3     | 320.32614               |             |
| Prestw-388    | 05G09                    | Dequalinium dichloride       |           | C30H40Cl2N4     | 527.5861                |             |
| Prestw-408    | 06A09                    | Butoconazole nitrate         |           | C19H18Cl3N3O3S  | 474.79661               |             |
| Prestw-412    | 06B03                    | Anisomycin                   |           | C14H19NO4       | 265.31183               |             |
| Prestw-524    | 07E05                    | Tiabendazole                 |           | C10H7N3S        | 201.25139               |             |
| Prestw-486    | 07A07                    | Colistin sulfate             |           | C52H102N16O21S2 | 1351.61534              |             |
| Prestw-541    | 07G02                    | Ciclopirox ethanolamine      |           | C14H24N2O3      | 268.35898               |             |
| Prestw-753    | 10D04                    | Demeclocycline hydrochloride |           | C21H22Cl2N2O8   | 501.32409               |             |
| Prestw-810    | 11A11                    | Sulconazole nitrate          |           | C18H16Cl3N3O3S  | 460.76952               |             |
| Prestw-897    | 12B08                    | Pipemidic acid               |           | C14H17N5O3      | 303.32329               |             |

|             |       |                       |                                                                                   |                                                                                 |           |                                                                                     |
|-------------|-------|-----------------------|-----------------------------------------------------------------------------------|---------------------------------------------------------------------------------|-----------|-------------------------------------------------------------------------------------|
| Prestw-1045 | 14A06 | Sertaconazole nitrate | 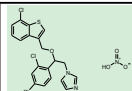 | C <sub>20</sub> H <sub>16</sub> Cl <sub>3</sub> N <sub>3</sub> O <sub>4</sub> S | 500.79122 |  |
|-------------|-------|-----------------------|-----------------------------------------------------------------------------------|---------------------------------------------------------------------------------|-----------|-------------------------------------------------------------------------------------|

22 drugs on nervous system

| Prestw-number | Plate Nb/<br>Position Nb | Chemical name                 | Structure                                                                           | fm <sub>l</sub> a structure                                                      | Mol weight<br>structure | Screen pics                                                                           |
|---------------|--------------------------|-------------------------------|-------------------------------------------------------------------------------------|----------------------------------------------------------------------------------|-------------------------|---------------------------------------------------------------------------------------|
| Prestw-47     | 01E08                    | Ticlopidine hydrochloride     | 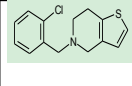   | C <sub>14</sub> H <sub>15</sub> Cl <sub>2</sub> N <sub>2</sub> S                 | 300.25235               |    |
| Prestw-64     | 01G05                    | Chlorpromazine hydrochloride  |    | C <sub>17</sub> H <sub>20</sub> Cl <sub>2</sub> N <sub>2</sub> S                 | 355.33235               |    |
| Prestw-78     | 01H09                    | Thioridazine hydrochloride    |    | C <sub>21</sub> H <sub>27</sub> ClN <sub>2</sub> S <sub>2</sub>                  | 407.04374               |    |
| Prestw-97     | 02B08                    | Disulfiram                    |    | C <sub>10</sub> H <sub>20</sub> N <sub>2</sub> S <sub>4</sub>                    | 296.5403                |    |
| Prestw-201    | 03E02                    | Ranitidine hydrochloride      |    | C <sub>13</sub> H <sub>23</sub> ClN <sub>4</sub> O <sub>3</sub> S                | 350.87026               |    |
| Prestw-167    | 03A08                    | Riluzole hydrochloride        |    | C <sub>8</sub> H <sub>6</sub> ClF <sub>3</sub> N <sub>2</sub> OS                 | 270.66202               |    |
| Prestw-227    | 03G08                    | Clemizole hydrochloride       |    | C <sub>19</sub> H <sub>21</sub> Cl <sub>2</sub> N <sub>3</sub>                   | 362.30532               |    |
| Prestw-239    | 03H10                    | Orphenadrine hydrochloride    |  | C <sub>18</sub> H <sub>24</sub> ClNO                                             | 305.85108               |  |
| Prestw-254    | 04B05                    | Nortriptyline hydrochloride   |  | C <sub>19</sub> H <sub>22</sub> ClN                                              | 299.84689               |  |
| Prestw-320    | 04H11                    | Fluphenazine dihydrochloride  |  | C <sub>22</sub> H <sub>28</sub> Cl <sub>2</sub> F <sub>3</sub> N <sub>3</sub> OS | 510.45316               |  |
| Prestw-328    | 05A09                    | Zoxazolamine                  |  | C <sub>7</sub> H <sub>5</sub> ClN <sub>2</sub> O                                 | 168.5837                |  |
| Prestw-329    | 05A10                    | Tacrine hydrochloride hydrate |  | C <sub>13</sub> H <sub>15</sub> ClN <sub>2</sub>                                 | 234.7309                |  |
| Prestw-344    | 05C05                    | Clorgyline hydrochloride      |  | C <sub>13</sub> H <sub>16</sub> Cl <sub>3</sub> NO                               | 308.63757               |  |
| Prestw-348    | 05C09                    | Chlorprothixene hydrochloride |  | C <sub>18</sub> H <sub>19</sub> Cl <sub>2</sub> N <sub>2</sub> S                 | 352.32883               |  |
| Prestw-375    | 05F06                    | Methiothepin maleate          |  | C <sub>24</sub> H <sub>28</sub> N <sub>2</sub> O <sub>4</sub> S <sub>2</sub>     | 472.62976               |  |
| Prestw-399    | 05H10                    | Prochlorperazine dimaleate    |  | C <sub>28</sub> H <sub>32</sub> Cl <sub>3</sub> N <sub>3</sub> O <sub>8</sub> S  | 606.09954               |  |

|            |       |                          |                                                                                   |              |           |                                                                                     |
|------------|-------|--------------------------|-----------------------------------------------------------------------------------|--------------|-----------|-------------------------------------------------------------------------------------|
| Prestw-511 | 07D02 | Fluoxetine hydrochloride | 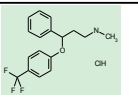 | C17H19ClF3NO | 345.79528 |  |
| Prestw-613 | 08F04 | Harmine hydrochloride    |  | C13H13ClN2O  | 248.71436 |  |
| Prestw-620 | 08F11 | Harmaline hydrochloride  |  | C12H11ClN2   | 218.68787 |  |
| Prestw-641 | 09A02 | Sulmazole                |  | C14H13N3O2S  | 287.34261 |  |
| Prestw-851 | 11F02 | Paroxetine Hydrochloride |  | C19H21ClFNO3 | 365.83552 |  |
| Prestw-995 | 13D06 | Fluvoxamine maleate      |  | C19H25F3N2O6 | 434.4161  |  |

7 others

| Prestw-number | Plate Nb/<br>Position Nb | Chemical name                           | Structure                                                                           | fmia structure | Mol weight<br>structure | Screen pics                                                                           |
|---------------|--------------------------|-----------------------------------------|-------------------------------------------------------------------------------------|----------------|-------------------------|---------------------------------------------------------------------------------------|
| Prestw-306    | 04G07                    | Clemastine fumarate                     | 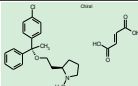   | C25H30ClNO5    | 459.97455               |    |
| Prestw-428    | 06C09                    | Cephaeline dihydrochloride heptahydrate |   | C28H54Cl2N2O11 | 665.65538               |   |
| Prestw-455    | 06F06                    | Mebhydroline 1,5-naphthalenedisulfonate |  | C48H48N4O6S2   | 841.06896               |  |
| Prestw-513    | 07D04                    | Norcyclobenzaprine                      |  | C19H19N        | 261.36998               |  |
| Prestw-846    | 11E07                    | Ethinylestradiol 3-methyl ether         |  | C21H26O2       | 310.44017               |  |
| Prestw-830    | 11C11                    | Ethaverine hydrochloride                |  | C24H30ClNO4    | 431.964                 |  |
| Prestw-1068   | 14C09                    | Thiethylperazine malate                 |  | C30H41N3O10S2  | 667.80337               |  |
