# Supplementary material for: Whole-Animal Chemical Screen Identifies Colistin as a New Immunomodulator That Targets Conserved Pathways
Source: PubMed Central journal article supplement — mBio. 2014 Aug 12;5(4):e01235-14. doi: 10.1128/mBio.01235-14 (PMC4145682; doi:10.1128/mbio.01235-14), 2014-08-12
Supplement: mbo004141937st4.pdf [file mbo004141937st4.pdf]

**Table S4. 54 overlap genes up regulated by colistin and genes positively induced by *Y. pestis*.**

| Gene Symbol | Gene Name       | Description                                                    | Fold Change |
|-------------|-----------------|----------------------------------------------------------------|-------------|
| ZK666.6     | <i>clec-60</i>  | C-type LECTin                                                  | 13.10       |
| C50B6.7     |                 | Glycoside hydrolase, catalytic domain                          | 8.68        |
| K08D8.5     |                 | CUB domain                                                     | 8.67        |
| C49C8.5     |                 | Fibrinogen, alphaVbetaVgamma chain, C-terminal globular domain | 7.75        |
| F54F3.3     | <i>lipl-1</i>   | Partial AB-hydrolase lipase domain                             | 7.05        |
| F40F4.6     |                 | C-type lectin                                                  | 6.89        |
| F49F1.6     | <i>mul-1</i>    | Metridin-like ShK toxin                                        | 6.84        |
| F42A10.7    |                 | F42A10.7                                                       | 6.55        |
| F38A5.3     | <i>lec-11</i>   | gaLECTin                                                       | 5.82        |
| K06G5.1     |                 | K06G5.1                                                        | 5.62        |
| F42A10.6    |                 | F42A10.6                                                       | 5.31        |
| F35C5.5     | <i>clec-62</i>  | C-type LECTin                                                  | 5.31        |
| F35E12.6    |                 | CUB domain                                                     | 5.27        |
| F56C9.7     |                 | Domain of unknown function DUF19                               | 5.18        |
| F35E12.5    |                 | CUB domain                                                     | 5.09        |
| F35C5.9     | <i>clec-66</i>  | C-type LECTin                                                  | 4.98        |
| M02H5.8     |                 | M02H5.8                                                        | 4.84        |
| B0035.13    |                 | Lipase, class 3                                                | 4.60        |
| F22B8.6     | <i>cth-1</i>    | CysVMet metabolism, pyridoxal phosphate-dependent enzyme       | 4.56        |
| F53E10.4    | <i>irg-3</i>    | F53E10.4                                                       | 4.41        |
| Y54G2A.8    | <i>clec-82</i>  | C-type LECTin                                                  | 3.93        |
| C05D9.2     | <i>Imp-2</i>    | LAMP (lysosome-associated membrane protein) homolog            | 3.73        |
| T28F3.8     |                 | Epidermal growth factor-like domain                            | 3.65        |
| Y54G2A.14   | <i>clec-83</i>  | C-type LECTin                                                  | 3.60        |
| C24B9.3     |                 | von Willebrand factor, type A                                  | 3.46        |
| M60.2       |                 | Endoribonuclease XendoU                                        | 3.44        |
| Y51H4A.24   |                 | Y51H4A.24                                                      | 3.43        |
| F55G11.8    |                 | CUB-like domain                                                | 3.40        |
| H20E11.1    |                 | CUB-like domain                                                | 2.86        |
| F13B6.3     |                 | F13B6.3                                                        | 2.75        |
| Y22D7AL.15  |                 | LPS-induced tumor necrosis factor alpha factor                 | 2.74        |
| F21F8.4     | <i>asp-12</i>   | Lon protease homolog, mitochondrial                            | 2.64        |
| K10C2.3     | <i>asp-14</i>   | ASpartyl Protease                                              | 2.60        |
| C33H5.13    |                 | C33H5.13                                                       | 2.56        |
| F21H7.4     | <i>clec-233</i> | C-type LECTin                                                  | 2.54        |
| F53A9.6     |                 | F53A9.6                                                        | 2.52        |

|           |                 |                                     |      |
|-----------|-----------------|-------------------------------------|------|
| T23B12.8  |                 | Cystine knot                        | 2.47 |
| F53A9.1   |                 | F53A9.1                             | 2.45 |
| B0218.1   | <i>faah-1</i>   | Fatty Acid Amide Hydrolase homolog  | 2.45 |
| F55F3.2   |                 | Carboxylesterase, type B            | 2.41 |
| C16B8.3   |                 | C16B8.3                             | 2.36 |
| K12G11.3  | <i>sodh-1</i>   | SOrbitol DeHydrogenase family       | 2.34 |
| M01D7.5   | <i>nlp-12</i>   | Neuropeptide-Like Protein           | 2.31 |
| T25B9.7   | <i>ugt-54</i>   | UDP-GlucuronosylTransferase         | 2.26 |
| F45E4.8   | <i>nlp-20</i>   | Neuropeptide-Like Protein           | 2.23 |
| F35C5.8   | <i>clec-65</i>  | C-type LECTin                       | 2.20 |
| K09C8.1   | <i>pbo-4</i>    | PBOc defective (defecation)         | 2.19 |
| T01D3.6   |                 | Epidermal growth factor-like domain | 2.18 |
| K11D2.2   | <i>asah-1</i>   | AcylSphingosine AmidoHydrolase      | 2.14 |
| F56D6.2   | <i>clec-67</i>  | C-type LECTin                       | 2.11 |
| F27E5.1   |                 | Acid ceramidase-like                | 2.07 |
| Y45F10A.5 | <i>nlp-17</i>   | Neuropeptide-Like Protein           | 2.06 |
| Y51H4A.7  |                 | Probable urocanate hydratase        | 2.04 |
| C06H5.1   | <i>fbxa-156</i> | F-box A protein                     | 2.03 |
