# Supplementary material for: Whole-Animal Chemical Screen Identifies Colistin as a New Immunomodulator That Targets Conserved Pathways
Source: PubMed Central journal article supplement — mBio. 2014 Aug 12;5(4):e01235-14. doi: 10.1128/mBio.01235-14 (PMC4145682; doi:10.1128/mbio.01235-14), 2014-08-12
Supplement: mbo004141937st6.pdf [file mbo004141937st6.pdf]

**Table S6. Overlap of pathways linked to immune or stress responses with genes up-regulated by colistin**

**Colistin Up-regulated (n=2538 genes)**

<http://www.geneprof.org/GeneProf/tools/hypergeometric.jsp>

| Gene Set Description | # Genes in Gene Set | Overlap | R.F. | p <       |
|----------------------|---------------------|---------|------|-----------|
| PMK-1_pozreg_86      | 86                  | 27      | 2.7  | 7.070E-07 |
| SKN-1_pozreg_232     | 232                 | 66      | 2.5  | 1.607E-12 |
| DAF-16_Class1_240    | 239                 | 65      | 2.4  | 2.094E-11 |
| SMA-6_pozreg_1469    | 1469                | 313     | 1.8  | 7.458E-29 |
| CED-1_pozreg_185     | 185                 | 37      | 1.7  | 5.727E-04 |
| Hypox_reg_107        | 107                 | 17      | 1.4  | 1.069E-01 |
| HIF-1_pozreg_54      | 54                  | 8       | 1.3  | 2.809E-01 |

**R.F.** = The Representation Factor is the number of overlapping genes divided by the expected number of overlapping genes drawn from 2 independent groups.

**p <** = The Hypergeometric Probability is the probability of finding x overlapping genes.

**References for Gene Sets**

CED-1\_pozreg\_185: Haskins et al., 2008, Dev Cell, 15: 87-97  
 DAF-16\_Class1\_239: Murphy et al., 2003, Nature, 424(6946): 277-283.  
 HIF-1\_pozreg\_54: Shen et al., 2005, JBC, 280(21): 20580-20588.  
 Hypox\_reg\_107: Shen et al., 2005, JBC, 280(21): 20580-20588.  
 PMK-1\_pozreg\_86: Troemel et al., 2006, PLoS Genetics, 2(11): e183.  
 SKN-1\_pozreg\_232: Oliveira et al., 2009, Aging Cell, 8(5): 524-541.  
 SMA-6\_pozreg\_1469: Roberts et al., 2010, BMC Dev Biol, 10:61.
